**Title:** Caregiver-mediated interventions to support self-regulation among infants and young children (0-5): A protocol for a realist review

Dr Amy Louise Finlay-Jones<sup>\*1,2,3</sup>

Associate Professor Elaine Bennett<sup>4,5</sup>

Associate Professor Jenny Downs<sup>1,6</sup>

Professor Sally Kendall<sup>7,8</sup>

Keerthi Kottampally<sup>1,9</sup>

Dr Yi Huey Lim<sup>1</sup>

Dr Vincent Mancini<sup>1</sup>

Professor Rhonda Marriott<sup>8</sup>

Professor Helen Milroy<sup>1,9</sup>

Dr Monique Robinson<sup>1</sup>

Associate Professor Justin Dean Smith<sup>10,11</sup>

Professor Lauren Wakschlag<sup>11</sup>

Associate Professor Jeneva L. Ohan<sup>9</sup>

\*Corresponding author, PO Box 855, West Perth, Western Australia, 6872, [amy.finlay-jones@telethonkids.org.au](mailto:amy.finlay-jones@telethonkids.org.au)

<sup>1</sup> Telethon Kids Institute, Nedlands, Australia

<sup>2</sup> School of Psychology, Curtin University, Bentley, Australia

<sup>3</sup> School of Medicine, The University of Western Australia, Crawley, Australia

<sup>4</sup> Ngala, Kensington, Australia

<sup>5</sup> School of Nursing and Midwifery, University of Notre Dame, Fremantle, Australia

<sup>6</sup> School of Physiotherapy, Curtin University, Bentley, Australia

<sup>7</sup> Centre for Health Services Studies, University of Kent, Canterbury, United Kingdom

<sup>8</sup> Ngangk Yira Aboriginal Research Centre, Murdoch University, Murdoch, Australia

<sup>9</sup> School of Psychological Sciences, University of Western Australia, Crawley, Australia

<sup>10</sup> School of Medicine, University of Utah, Utah, United States of America

<sup>11</sup> Feinberg School of Medicine, Northwestern University, United States of America

Full name, department, institution, city and country of all co-authors

Word count, excluding title page, abstract, references, figures and tables: 3906

## Abstract

**Background and Objectives.** Self-regulation is a modifiable protective factor for lifespan mental and physical health outcomes. Early caregiver-mediated interventions to promote infant and child regulatory outcomes prevent long-term developmental, emotional, and behavioural difficulties and improve outcomes such as school readiness, educational achievement, and economic success. To harness the population health promise of these programmes, there is a need for more nuanced understanding of the impact of these interventions. The aim of this realist review is to understand how, why, under which circumstances, and for whom, early caregiver-mediated interventions improve infant and child self-regulation. The specific research questions guiding this review were based on consultation with families and community organizations that provide early childhood and family services.

**Design, Methods and Analysis:** Realist reviews take a theory-driven and iterative approach to evidence synthesis, structured around continuous refinement of a programme theory. Programme theories specify context-mechanism-outcome configurations to explain what works, for whom, under which circumstances, and how. Our initial programme theory is based on prior work in this field and will be refined through searching peer-reviewed and grey literature to identify relevant evidence. A working group, comprising service users, community organization representatives, representatives from specific populations, clinicians, and review team members will be formed to guide the evidence synthesis and interpretation, as well as the development and dissemination of recommendations based on the findings of the review. The review will involve searching: (1) electronic databases (e.g. EMBASE, Medline, PsycInfo), (2) connected papers, articles and citations, and (3) grey literature. Decisions to include evidence will be guided by judgements about their contribution to the programme theory and will be made by the research

team, with input from the working group as required. Evidence synthesis will be reported using the RAMESES guidelines and disseminated through peer-reviewed publication.

**Trial registration number:** The protocol is registered with Open Science Framework

<https://osf.io/5ce2z/registrations>

## Strengths and Limitations

- Uses a realist approach to provide insight into *what works, for whom, under which circumstances, and how* for caregiver-mediated interventions designed to promote self-regulation outcomes among infants and young children.
- Research questions were developed in consultation with families and service providers.
- Decision-making will be transparently documented, and all review materials made available on the Open Science Framework repository.
- The programme theory will be largely derived from peer-reviewed journal articles, and therefore may be subject to publication bias.

## Background

Self-regulation is an umbrella term used to refer to a variety of top-down and bottom-up processes implicated in the capacity to flexibly regulate behaviour, cognition, and emotion.<sup>1 2</sup> Across developmental stages, healthy self-regulation is consistently associated with better mental health and adaptive functioning and improved human capital<sup>3-6</sup> while self-regulatory difficulties are a risk factor for later mental and physical health problems.<sup>5-8</sup> For example, self-regulatory difficulties in early childhood are associated with rapid weight gain through to early adolescence,<sup>9</sup> while longitudinal studies have demonstrated that adults with no history of psychiatric diagnoses have significantly greater self-regulation in childhood than those with lifetime history of mental health problems.<sup>4</sup> Differences in early self-regulation have been implicated in resilience to early adversity<sup>10-12</sup> even when controlling for IQ and socioeconomic status.<sup>12</sup> Self-regulation also predicts school readiness,<sup>13</sup> academic achievement,<sup>14</sup> self-worth, substance use, economic outcomes and criminal involvement.<sup>6 15 16</sup>

Interactions between biological and environmental factors shape regulatory outcomes over the course of infancy and early childhood.<sup>17 18</sup> Among typically developing children, basic self-regulatory capacities begin to emerge in the first months of life<sup>19 20</sup> and increase in complexity across development, demonstrating a developmental cascade effect that parallels changes in neurobiology.<sup>21-23</sup> This dynamic and self-reinforcing process supports increasingly sophisticated skills for adaptive and executive functioning:<sup>24 25</sup> as children develop greater self-regulatory skills, they are more able to effectively engage with their environment, thereby fostering more adaptive outcomes.<sup>26 27</sup> It is important to note, however, that these adaptive developmental cascades assume that children develop in the context of manageable demands on their self-regulatory capacities. In the context of early adversity such as adverse prenatal

exposures,<sup>28 29</sup> socioeconomic stress, psychosocial threat, and neglect, cascade effects of adversity can work in the opposite way, undermining self-regulation and driving negative sequelae well into adulthood.<sup>5 30</sup>

### ***Promoting self-regulation through early intervention: the role of caregivers***

Caregivers are instrumental in the development and maintenance of self-regulatory capacities among infants and young children.<sup>31</sup> As they develop, infants transition from dependence on caregivers for co-regulation to more autonomous self-regulation via multiple, co-occurring socialization processes.<sup>32</sup> Regardless of developmental stage, in situations where regulatory demands are overwhelming, co-regulation via caregivers is important to support infants and children to respond adaptively to their environment. However, much like other environmental influences, the impact of caregiver behaviour on child self-regulatory outcomes can be positive or negative: reviews and meta-analyses have found that the use of positive caregiving strategies (such as guiding and encouraging) is associated with more adaptive child self-regulation, while negative caregiving strategies (such as criticism) are associated with poorer self-regulatory outcomes.<sup>31-34</sup> Furthermore, evidence that caregiving mediates the relationship between early adversity and regulatory outcomes in children<sup>35 36</sup> suggests that supporting positive caregiving practices is particularly important for families experiencing adversity.

Evidence supports the assertion that caregiver-mediated interventions designed to foster self-regulation among infants and young children have potential to interrupt negative developmental cascades, and promote positive ones.<sup>22</sup> Prior work by Murray and colleagues<sup>37</sup> reviewing studies of self-regulation programmes between 1989-2013 demonstrated the breadth of this literature, although they found substantially fewer programmes targeting the birth to age 2 year group (k = 27) than those targeting 3-4 year olds (k = 75). Programmes that have been

found to promote self-regulation in infants and young children include, but are not limited to, Attachment and Biobehavioural Catch-Up,<sup>38 39</sup> Triple P,<sup>40</sup> the Incredible Years,<sup>41-43</sup> the Family Check-Up,<sup>44 45</sup> Parent-Child Interaction Therapy,<sup>46-49</sup> Head Start,<sup>50-52</sup> the Chicago School Readiness Project,<sup>53</sup> the Kids in Transition to School Project,<sup>54</sup> and Tools of the Mind.<sup>25 55-58</sup> However, inconsistencies in these programmes and their evaluation undermine capacity to draw inferences about how early self-regulation programmes work. For example, not all these programmes specifically target self-regulatory outcomes, there are differences used in the terminology used to describe the programme targets and components, and self-regulation outcomes are measured inconsistently across trials.<sup>2 59</sup> Accordingly, it is unclear which components are considered key to promoting self-regulation outcomes and which are extraneous to this goal.<sup>2</sup>

### ***Factors influencing the effectiveness of caregiving programs to improve child self-regulation***

Conceptual and methodological issues notwithstanding, these interventions have shown evidence of benefit for a range of parent and child outcomes across a variety of populations and settings.<sup>60-63</sup> For example, there is evidence that early intervention can improve self-regulation among infants and children exposed to early risk factors, such as socioeconomic adversity,<sup>64</sup> foster care,<sup>38</sup> neglect,<sup>39</sup> and pre-term birth.<sup>65</sup> Early caregiving programmes may improve self-regulation outcomes when delivered remotely<sup>66</sup> and in primary care settings. Together, these findings indicate a robustness of intervention effects across contexts. However, prior reviews and meta-analyses have also revealed important findings about the implementation of these interventions, including barriers to engagement and the circumstances under which such interventions do not work. For example, service location, incompatibility of programme delivery with work schedules, transport barriers, perceived stigma, and cost of delivery create

considerable barriers to programme engagement and implementation.<sup>67 68</sup> Synthesizing these data on practical considerations that influence engagement and outcomes is important to inform implementation strategies.

Despite the apparent robustness of self-regulation interventions across contexts, previous work has also highlighted how intervention characteristics interact with contextual factors to influence intervention effects. For instance, Rayno and McGrath<sup>69</sup> found that socioeconomic status and maternal mental health significantly predicted response to parenting interventions for child externalizing behaviour problems. Based on work demonstrating that socioeconomic stress adversely impacts caregiving behaviour by increasing caregiver distress, Rayno and McGrath suggested that one way of optimising intervention-context fit is to include additional components focusing on caregiver mental health when programmes are delivered to families with higher socioeconomic stress. Similarly, Harris, et al.<sup>66</sup> found that contact with an interventionist was necessary for technology-assisted caregiving interventions to effectively improve parent wellbeing in socioeconomically disadvantaged families. These findings illustrate the complexities of delivering ‘evidence-based’ caregiver-mediated self-regulation interventions in different settings for different target groups. The lack of synthesised understanding of how to respond to these complexities when delivering interventions can undermine translation. In reviewing the literature on caregiving interventions in paediatric primary care, Smith, et al.<sup>70</sup> found that the dearth of information regarding implementation methods and contexts undermined the potential to deliver scalable and equitable caregiving intervention models.

## **Aims and Objectives**

The aim of the current review is to extend existing evidence syntheses to provide insight into context-mechanism-outcome combinations underlying self-regulation interventions for 0-5 -



year-old children. We aim to highlight *how* and *why* these programmes work, as well as to identify *for whom* and *under which circumstances* these programmes lead to positive outcomes for children and families.

Our objectives are as follows:

1. To synthesize insights from peer-reviewed and grey literature, stakeholder perspectives, and expert guidance regarding what works, for whom, under which circumstances, and how, for caregiver-mediated self-regulation interventions for infants and young children.
2. To develop a set of programme theories and corresponding evidence maps documenting relationships between intervention components, contextual factors, and mechanisms influencing outcomes of these interventions.
3. To produce guidelines for intervention development and implementation based on the evidence synthesis.

## Methods

### Realist Review

This review will use a realist approach to address questions around intervention mechanisms and implementation contexts and to generate insights into the question of what works, for whom, how, and in which settings. Realist synthesis is particularly useful where research is heterogenous, as is the case for the literature on early self-regulation interventions.<sup>71</sup> The realist approach aims to generate policy-relevant findings for the purposes of decision-making in programme financing and implementation. Realist approaches are appropriate for complex interventions where intervention effects are context-dependent. While randomised

controlled trials and meta-analyses help to answer the question of whether self-regulation interventions are effective or not, realist synthesis is a theory-driven approach that seek to determine why and how interventions do/do not work for different people in across different contexts.<sup>72 73</sup>

## **Patient and Public Involvement**

The need for this review emerged from a series of consultations with families with a child with developmental, emotional and/or behavioural difficulties, for the purposes of understanding their needs regarding early screening and support. These consultations highlighted that parental awareness of children’s developmental difficulties often preceded formal recognition of these difficulties by health professionals, and that due to the highly variable nature of early development, families were frequently told to “wait and see” whether more pronounced and stable child difficulties would emerge. Families described this as a time of high concern and stress, with caregiver mental health and family functioning undermined by the burden of child developmental, emotional and/or behavioural difficulties coupled with the anxiety of “not knowing.” Accordingly, a potential solution was to investigate early intervention approaches that were *cross-syndrome* or *transdiagnostic*; that is, they target risk and/or protective factors that are implicated in a wide range of developmental, emotional and behavioural difficulties, and can be implemented prior to formal diagnosis.

Self-regulation is one such transdiagnostic factor that is meaningful to caregivers and service providers, given that child self-regulatory difficulties are a common reason that parents seek support from health professionals and family services. Our community partners (organisations providing family and early childhood services in Australia) identified a gap in the availability of evidence-based self-regulation interventions for infants and toddlers and expressed

a desire to understand more about which interventions should be recommended for which families under which circumstances. Of particular interest to our community partners is the appropriateness of different self-regulation interventions for Aboriginal and Torres Strait Islander (Indigenous) families, Culturally and Linguistically Diverse (CALD) families, families experiencing socioeconomic disadvantage, and families living in rural and remote areas.

Together, the input from families and community partners directly shaped the focus of the proposed review. The need to synthesise insights into *what works, for whom, under which circumstances and how* for early self-regulation interventions is guided by our community partners' interest in optimising intervention strategies for the multiple communities they serve. It is also of importance to guide families, who, in the absence of formal recognition and guidance regarding child difficulties, are often required to make decisions about which types of strategies and services are most appropriate for their needs.

We have planned for ongoing involvement of families and community partners in the review process. We will establish a working group with a balance of caregivers and representatives from community organisations to provide input into all stages of the review. The group will comprise representatives from community organizations (early childhood and family services), practitioners, service users (i.e. parents with young children), research and clinical experts in the field of infant and child self-regulation, as well as members of the review team. The working group will play a key role in interpreting the findings of the review, developing theory, and establishing consensus. They will also play a key role in developing the recommendations and guiding translation of the findings into policy and practice. We anticipate that the findings of the review will be used to guide intervention development and/or implementation as part of our ongoing work in this field. Families and community partners

would also be closely involved as co-design partners in any intervention development or the generation of implementation recommendations arising from this review.

## Research Questions

We will use a realist synthesis approach to answer the following questions:

1. What are the key contextual factors (for example, implementation strategies, setting, mode of delivery, and population characteristics) which influence the success or failure of early caregiving interventions to support self-regulation?
2. What are the core intervention components and key intervention mechanisms which, in the right contexts, lead to the success of early caregiving interventions to support self-regulation?
3. How do core components and key intervention mechanisms vary across age groups from 0-5 years?
4. What is known about “what works” to improve child self-regulatory outcomes among (i) Indigenous and CALD families; (ii) families with socioeconomic disadvantage; and (iii) families living in rural and remote areas? Specifically, how do contextual factors, core components, key mechanisms and outcomes vary across populations?
5. How might these findings influence future research, policy, and practice?

## Design

We will follow the five steps outlined by Pawson, et al.<sup>74</sup>: (1) clarifying the review’s scope; (2) defining the search strategy; (3) selecting studies for inclusion in the review; (4) extracting data from included studies; and (5) evidence synthesis and recommendations. Steps 1-2 and 5 will be done in active consultation with working groups formed with families and other

stakeholders. The review will be reported according to the Realist and MEta-narrative Evidence Synthesis: Evolving Standards (RAMESES) standards for realist syntheses.<sup>75</sup> The review was registered with the Open Science Framework on the 10<sup>th</sup> October, 2020. Project documents, including refinements to the search strategy, decisions regarding evidence inclusion and exclusion, and amendments to the protocol will be documented on the project site (<https://bit.ly/34J7oY2>).

The primary output of this review will be an evidence-based programme theory for early caregiving interventions to support infant and child self-regulation, highlighting the key mechanisms of these interventions and the contextual factors that influence their effectiveness across populations and settings. We aim to use the findings of this review to generate a set of recommendations for the development and delivery of early caregiving programmes to optimise intervention effectiveness, fidelity, and equity. Recommendations will concern core components, implementation principles and strategies, and considerations regarding setting and mode of delivery. We also aim to use the findings of this review to inform local intervention development and implementation efforts.

## **Working Definitions and Preliminary Scope**

For the purposes of this review, ‘early self-regulation interventions’ are those that are delivered from the time children are born up to and including 5 years of age. We will focus on caregiver-mediated interventions given that most early self-regulation interventions for this age group focus on caregivers<sup>76</sup> and because this focus aligns with the priorities and interests of the families and community organisations we consulted with. Following Murray and colleagues,<sup>37</sup> we will include studies of caregiving interventions that either explicitly target infant/child self-regulation or those that measure infant or child self-regulation as an outcome. As interventions

that promote self-regulation have been referred to in the literature using various terms, we will also focus on interventions that aim to promote children's executive functioning and emotion regulation skills and reduce challenging behaviour. We will include universal or targeted interventions delivered across all contexts and settings.

## **Step 1: Clarifying the scope of the review and developing a programme theory**

Realist reviews are theory-driven, using an iterative approach to selecting, developing, and refining programme theories to explain why and how interventions work for different people in different contexts.<sup>72 74</sup> Thus, the first stage of the review will involve clarifying the review scope and defining the initial programme theory. Given the inconsistencies in terminology used across self-regulation interventions, an initial step is to identify key constructs associated with “self-regulation intervention” and develop a list of exemplar programs. These will be identified through initial scoping of the literature using a broad set of search terms (see Table 1 for an example of the Medline search strategy). In addition to searching peer reviewed and grey literature, we will liaise with the working group to identify other forms of evidence that do not take the form of peer reviewed studies, such as policy documents. At the scoping stage, we will focus on programmes that have been developed for infants and young children, 0-5 years, that involve caregiver-mediated strategies to promote child self-regulation and/or that measure infant and child self-regulation as an outcome. As the focus of the realist review is on theory development, we will include intervention studies with and without a comparator condition.

In the realist approach, programme theories are comprised of ‘context’ (C), ‘mechanism’ (M) and ‘outcome’ (O) – referred to here as the C-M-O framework. Interventions are thought to impact outcomes by altering context (e.g., increasing caregiver knowledge and skills), thereby influencing the mechanisms (e.g., increasing responsive caregiving behaviour) that drive

outcomes. Prior reviews have demonstrated that caregiving programs to improve child self-regulation include a vast array of program components. For example, effective interventions for preschool-age children have included components to increase proactive parenting, parent involvement, positive behaviour management, parental guidance, and limit-setting.<sup>45 51</sup> It is unclear whether these different components influence self-regulatory outcomes via a smaller subset of shared mechanisms. For example, Sandler, et al.<sup>77</sup> suggest that three main factors account for long-term effects of parenting programmes: parenting skills, self-efficacy, and parent mental health.

**Table 1.** Medline search strategy for scoping stage

| Concept              | Search Terms                                                                                                                                                                                                                                                                                                                                                                                                                                                                                                                                                                                                                 |
|----------------------|------------------------------------------------------------------------------------------------------------------------------------------------------------------------------------------------------------------------------------------------------------------------------------------------------------------------------------------------------------------------------------------------------------------------------------------------------------------------------------------------------------------------------------------------------------------------------------------------------------------------------|
| Infants and Children | (*Child, Preschool/ or child*.mp.) OR (infant*.mp. or *Infant, Newborn/) OR (baby.mp.) OR (babies.mp.) OR (preschool.mp.) OR (toddler*.mp.)                                                                                                                                                                                                                                                                                                                                                                                                                                                                                  |
| Self-regulation      | (self regulation.mp. or Self-Control/) OR (*Emotions/ or *Emotional Regulation/ or emotio* regulation.mp.) OR (dysregulate*.mp) OR (*Child Behavior Disorders/ or *Executive Function/ or behavio\$r regulation.mp. or *Attention Deficit Disorder with Hyperactivity/) OR (cognitive flexibility.mp.) OR (cognitive control.mp. or *Attention/) OR (*Inhibition, Psychological/ or behavio\$r* inhib*.mp.) OR (inhib* behav*.mp.) OR (*Temperament/ or effortful control.mp. or *Internal-External Control/) OR (working memory.mp.) OR (*Social Behavior Disorders/ or social skills.mp. or *Social Adjustment/ or *Social |

|                                  |                                                                                                                                                                                                                                                                                                                                                                                                                                                                                                                                                                                  |
|----------------------------------|----------------------------------------------------------------------------------------------------------------------------------------------------------------------------------------------------------------------------------------------------------------------------------------------------------------------------------------------------------------------------------------------------------------------------------------------------------------------------------------------------------------------------------------------------------------------------------|
|                                  | Behavior/ or *Interpersonal Relations/) OR (*Impulsive Behavior/ or impulsiv*.mp.) OR (*Risk-Taking/ or sensation seeking.mp.) OR (social cognit*.mp.) OR (*Social Perception/ or *Adaptation, Psychological/ or soci* emot*.mp. or *Social Behavior/) OR (social competence.mp.) OR (emotion* processing.mp.) OR (attention* control.mp.) OR (*Irritable Mood/ or irritability.mp.) OR (disruptive behavior.mp. or *Problem Behavior/) OR (negative affect*.mp.) OR (negative emotionality.mp.) OR (temper outburst*.mp.) OR (temper tantrum.mp. or *Child Behavior Disorders/) |
| Caregiver-mediated interventions | ((intervention.mp.) OR (therapy.mp.) OR (psychotherapy.mp.) OR (program*.mp.) OR (psychoeducation.mp.) OR (training.mp)) AND ((*Parent-Child Relations/ or *Parents/ or parent mediated.mp. or *Parenting/) OR (parent*.mp.) OR (co-regulation.mp.) OR (parent child.mp.) OR (caregiv*.mp) OR (*Mother-Child Relations/) OR (maternal.mp OR mother*.mp OR father*.mp))                                                                                                                                                                                                           |

In the scoping stage, we aim to identify existing programme theories, or components of programme theories, from the literature and other evidence documents. Following Coles, et al.<sup>78</sup> programme theories may be identified from literature describing the hypothesized causal mechanisms of the programs, their theoretical bases, and descriptions of the relationship between programme activities and outcomes. These theories will be synthesized to generate a programme theory structured around the C-M-O framework. We will also consult with the working group to identify experts and key stakeholders to input to the programme theory. The resulting theoretical,



explanatory model and its component contexts, mechanisms and outcomes of interest will be used as the framework for the succeeding stages of the review.

## **Step 2. Refining the search strategy**

The refined search strategy will be based on the emerging programme theory. Given the vast array of potential contexts, mechanisms, and outcomes that may emerge from the self-regulation intervention literature, we will consult with the working group to decide which C-M-O variables should be the primary focus of the review. Once this has been agreed, we will systematically search for literature to extend and refine the scope of studies identified in Step 1, with the aim of testing and refining the programme theory. This approach aligns with the iterative nature of the realist methodology.<sup>74</sup> Electronic database searching in Ovid Embase, PsycInfo, Medline and Web of Science<sup>79</sup> will be carried out using keywords based on the interventions, concepts, mechanisms, theories, and outcomes identified in the scoping stage. We will identify additional studies for inclusion by handsearching reference lists of included papers to find connected texts and by searching the grey literature. The search will be a multi-stage process that integrates consultation with the working group and other key stakeholders. A series of Endnote libraries will be created to document the results of each stage of the search process.

## **Step 3: Selecting data sources for inclusion in the review**

Selection of data sources for inclusion in the review will primarily be based on their relevance to the C-M-O components of the programme theory. Several different types of evidence can be integrated within the scope of a realist review<sup>75</sup>; accordingly, we anticipate that data sources will include peer-reviewed journal articles, policy documents, and programme manuals. Two research team members will independently screen titles and abstracts of the data

sources against the inclusion and exclusion criteria (or refined versions of these criteria developed following the initial search). Data sources will be independently ranked by two members of the team, according to their relevance to their programme theory and the rigour of the findings. The “rigour” dimension will be appraised by the review team members based on how robustly the methods of a given data source (including entire studies and components within a study) support the conclusions drawn from it. The review team will use these rankings to guide selection of data sources, in consultation with the working group. Excel spreadsheets will be used to track decisions and rationale for the inclusion and exclusion of specific studies.

#### **Step 4: Extracting data from included sources**

According to the realist approach, extracted data should be used to determine whether programme theories and their components are meaningful and productive.<sup>80</sup> Data sources and extracted data will therefore be included based on their capacity to test and refine the emerging programme theory. Extracted data will be mapped against the programme theory and research questions, with the overarching aim of identifying the core components of effective self-regulation interventions across contexts. We will design data extraction forms based on the C-M-O framework and using the interventions, contexts, mechanisms, theories, and outcomes identified in the scoping stage. It is anticipated that, at a minimum, extracted data will include study authors, year of publication, study country; study design; sample characteristics and inclusion criteria; intervention components, mode of delivery, and characteristics of intervention facilitators, as well as data on the context in which the intervention is studied, and predictors, mediators, and moderators of intervention outcome. Finally, we will extract data on outcomes: our primary outcome of interest is infant and child self-regulation, however we are also interested in related outcomes such as infant and child mental health, family functioning,

caregiver mental health, self-regulation, caregiving behaviours, and self-efficacy. Quality appraisal (separate from evaluations of relevance and rigour) will be undertaken to summarise the overall quality of the included studies. We will use the Cochrane RoB 2 revised risk-of-bias tool<sup>81</sup> for randomized trials, the Cochrane ROBINS-I tool<sup>82</sup> for non-randomized intervention studies, and the 32-item Consolidated Criteria for Reporting Qualitative Research.<sup>83</sup>

## **Step 5: Evidence synthesis and recommendations**

The focus of evidence synthesis will be on the testing and refinement of the programme theory. In this stage of the review, we will code interventions using the C-M-O framework and generate a series of C-M-O configurations that can be applied to different populations across different settings. We will undertake qualitative data synthesis using NVivo, and map interventions against C-M-O variables using an evidence mapping spreadsheet developed for the purposes of this review. Where relevant, summary statistics will be used to characterise the included studies. We will use a narrative approach to synthesise findings and report these according to the RAMESES guidelines.

## **Generation of Recommendations and Dissemination of Findings.**

A draft summary of the findings and recommendations will be reviewed by the working group and key stakeholders, who will provide input into their relevance and meaning for policy and practice applications. A final list of recommendations for the development and implementation of caregiver-mediated interventions to support self-regulation among infants and young children will be determined by consensus of the working group. Findings and recommendations will be disseminated through a report and policy brief, journal articles, and

stakeholder presentations. We will also work with the caregivers in our working group and broader community networks to develop evidence summaries that are useful to families.

## **Discussion**

### **Importance of the Research**

Self-regulation is a cornerstone of healthy development,<sup>5</sup> and early interventions to promote self-regulation have potential to support adaptive outcomes across the lifespan.<sup>37</sup> This realist review will provide important insights into how caregiver-mediated interventions for infants and young children promote self-regulation outcomes and improve long-term functioning. Understanding how such interventions work, who they work for, and under which contexts, can help to optimize intervention and implementation strategies. Documenting how well the existing evidence supports the programme theory will also aid in refining theoretical understandings of caregiver-mediated interventions for infants and young children and highlight key gaps in the research. In addition, identifying mechanisms underlying early caregiver-mediated programmes to improve self-regulation process, will enable us to design experimental studies to test these mechanisms in the future.

We anticipate that the findings of this review will provide key practical advice for health professionals and community service providers working to provide early childhood and family services, as well as service users, policymakers, and researchers. Our intention is to provide a trans-professional explanation of how, why, and under which circumstances caregiver-led self-regulation interventions can best support children's development. We will work with the range of stakeholders in our working group to determine the best way to summarise and disseminate the findings from the review so it can be used to guide practical decisions around implementation.

**Contributors** AFJ conceptualised the study and led the design and drafting of the review protocol and manuscript. KK, JO and LW helped to draft the search protocol. All authors provided feedback on the review protocol and provided comments to improve the manuscript. All authors have read and approved the final manuscript. AFJ acts as guarantor for the review.

**Funding** This research received no specific grant from any funding agency in the public, commercial or not-for-profit sectors. Project staff are supported by funding from the NHMRC FASD Centre of Research Excellence. AFJ is supported by a fellowship from the Starlight Children's Foundation. No funder played any role in developing the review protocol.

## References

1. Nigg JT. Annual Research Review: On the relations among self-regulation, self-control, executive functioning, effortful control, cognitive control, impulsivity, risk-taking, and inhibition for developmental psychopathology. *J Child Psychol Psychiatry* 2017;58(4):361-83. doi: 10.1111/jcpp.12675
2. Morawska A, Dittman CK, Rusby JC. Promoting self-regulation in young children: The role of parenting interventions. *Clinical Child and Family Psychology Review* 2019;22:43-51. doi: <https://doi.org/10.1007/s10567-019-00281-5>
3. Eisenberg N, Spinrad TL, Eggum ND. Emotion-related self-regulation and its relation to children's maladjustment. *Annu Rev Clin Psychol* 2010;6(1):495-525. doi: 10.1146/annurev.clinpsy.121208.131208
4. Schaefer JD, Caspi A, Belsky DW, et al. Enduring mental health: Prevalence and prediction. *J Abnorm Psychol* 2017;126(2):212-24. doi: 10.1037/abn0000232
5. Robson DA, Allen MS, Howard SJ. Self-regulation in childhood as a predictor of future outcomes: A meta-analytic review. *Psychological Bulletin* 2020;146(4):324-54.
6. Moffitt TE, Arseneault L, Belsky DW, et al. A gradient of childhood self-control predicts health, wealth, and public safety. *PNAS* 2011;108:2693-98. doi: <https://doi.org/10.1073/pnas.1010076108>
7. Wakschlag LS, Roberts MY, Flynn RM, et al. Future Directions for Early Childhood Prevention of Mental Disorders: A Road Map to Mental Health, Earlier. *Journal of clinical child and adolescent psychology : the official journal for the Society of Clinical Child and Adolescent Psychology, American Psychological Association, Division 53* 2019;48(3):539-54. doi: 10.1080/15374416.2018.1561296 [published Online First: 2019/03/28]

8. Wakschlag LS, Roberts MY, Flynn RM, et al. Future directions for early childhood prevention of mental disorders: A road map to mental health, earlier. *Journal of Clinical Child & Adolescent Psychology* 2019;48(3):539-54. doi: 10.1080/15374416.2018.1561296
9. Francis LA, Susman EJ. Self-regulation and rapid weight gain in children from age 3 to 12 years. *Archives of Pediatrics & Adolescent Medicine* 2009;163(4):297-302. doi: 10.1001/archpediatrics.2008.579
10. Buckner JC, Mezzacappa E, Beardslee WR. Characteristics of resilient youths living in poverty: the role of self-regulatory processes. *Dev Psychopathol* 2003;15(1):139-62. doi: 10.1017/s0954579403000087 [published Online First: 2003/07/10]
11. Cicchetti D, Rogosch FA. Adaptive coping under conditions of extreme stress: Multilevel influences on the determinants of resilience in maltreated children. *New Dir Child Adolesc Dev* 2009;2009(124):47-59. doi: 10.1002/cd.242
12. Obradović J. Effortful control and adaptive functioning of homeless children: Variable-focused and person-focused analyses. *Journal of applied developmental psychology* 2010;31(2):109-17. doi: 10.1016/j.appdev.2009.09.004
13. Blair C, Raver CC. School readiness and self-regulation: A developmental psychobiological approach. *Annual Review of Psychology* 2015;66:711-31. doi: 10.1146/annurev-psych-010814-015221
14. McClelland MM, Acock AC, Piccinin A, et al. Relations between preschool attention span-persistence and age 25 educational outcomes. *Early Childhood Research Quarterly* 2013;28:314-24. doi: 10.1016/j.ecresq.2012.07.008
15. Calkins SD, Fox NA. Self-regulatory processes in early personality development: A multilevel approach to the study of childhood social withdrawal and aggression. *Development and Psychopathology* 2002;14:477-98.
16. Calkins SD, Keane SP. Developmental origins of early antisocial behavior. *Development and psychopathology* 2009;21(4):1095-109. doi: 10.1017/S095457940999006X

17. Kochanska G, Murray KT, Harlan ET. Effortful Control in Early Childhood: Continuity and Change, Antecedents, and Implications for Social Development. *Dev Psychol* 2000;36(2):220-32. doi: 10.1037/0012-1649.36.2.220
18. Montroy JJ, Bowles RP, Skibbe LE, et al. The development of self-regulation across early childhood. *Dev Psychol* 2016;52(11):1744-62. doi: 10.1037/dev0000159
19. Kopp CB. Antecedents of self-regulation: A developmental perspective. *Developmental psychology* 1982;18(2):199-214. doi: 10.1037/0012-1649.18.2.199
20. Kopp CB. Regulation of Distress and Negative Emotions: A Developmental View. *Developmental psychology* 1989;25(3):343-54. doi: 10.1037/0012-1649.25.3.343
21. Cox MJ, Mills-Koonce R, Propper C, et al. Systems theory and cascades in developmental psychopathology. *Dev Psychopathol* 2010;22(3):497-506. doi: 10.1017/s0954579410000234 [published Online First: 2010/06/26]
22. Masten AS, Cicchetti D. Developmental cascades. *Dev Psychopathol* 2010;22(3):491-95. doi: 10.1017/S0954579410000222
23. Rothbart MK, Sheese BE, Rueda MR, et al. Developing mechanisms of self-regulation in early life. *Emot Rev* 2011;3(2):207-13. doi: 10.1177/1754073910387943
24. Fiske A, Holmboe K. Neural substrates of early executive function development. *Developmental Review* 2019;52:42-62. doi: <https://doi.org/10.1016/j.dr.2019.100866>
25. Blair C, Raver CC. Closing the Achievement Gap through Modification of Neurocognitive and Neuroendocrine Function: Results from a Cluster Randomized Controlled Trial of an Innovative Approach to the Education of Children in Kindergarten. *PLoS One* 2014;9(11):e112393. doi: 10.1371/journal.pone.0112393
26. Eisenberg N, Valiente C, Eggum ND. Self-Regulation and school readiness. *Early Educ Dev* 2010;21(5):681-98. doi: 10.1080/10409289.2010.497451



27. Williams KE, Berthelsen D. The development of prosocial behaviour in early childhood: Contributions of early parenting and self-regulation. *International Journal of Early Childhood* 2017;49(1):73-94. doi: 10.1007/s13158-017-0185-5
28. Wiebe SA, Clark CAC, De Jong DM, et al. Prenatal tobacco exposure and self-regulation in early childhood: Implications for developmental psychopathology. *Dev Psychopathol* 2015;27(2):397-409. doi: 10.1017/S095457941500005X
29. Clark CAC, Espy KA, Wakschlag L. Developmental pathways from prenatal tobacco and stress exposure to behavioral disinhibition. *Neurotoxicology and teratology* 2016;53:64-74. doi: 10.1016/j.ntt.2015.11.009
30. Palacios-Barrios EE, Hanson JL. Poverty and self-regulation: Connecting psychosocial processes, neurobiology, and the risk for psychopathology. *Comprehensive Psychiatry* 2019;90:52-64. doi: 10.1016/j.comppsy.2018.12.012
31. Fay-Stammach T, Hawes DJ, Meredith P. Parenting Influences on Executive Function in Early Childhood: A Review. *Child development perspectives* 2014;8(4):258-64. doi: 10.1111/cdep.12095
32. Morris AS, Silk JS, Steinberg L, et al. The role of the family context in the development of emotion regulation. *Soc Dev* 2007;16(2):361-88. doi: 10.1111/j.1467-9507.2007.00389.x
33. Karreman A, van Tuijl C, van Aken MAG, et al. Parenting and self-regulation in preschoolers: a meta-analysis. *Infant and child development* 2006;15(6):561-79. doi: 10.1002/icd.478
34. Valcan DS, Davis H, Pino-Pasternak D. Parental Behaviours Predicting Early Childhood Executive Functions: a Meta-Analysis. *Educational Psychology Review* 2018;30(3):607-49. doi: 10.1007/s10648-017-9411-9
35. Blair C, Granger DA, Willoughby M, et al. Salivary Cortisol Mediates Effects of Poverty and Parenting on Executive Functions in Early Childhood. *Child Dev* 2011;82(6):1970-84. doi: 10.1111/j.1467-8624.2011.01643.x

36. Lengua LJ, Kiff C, Moran L, et al. Parenting Mediates the Effects of Income and Cumulative Risk on the Development of Effortful Control. *Social development (Oxford, England)* 2014;23(3):631-49. doi: 10.1111/sode.12071
37. Murray DW, Rosanbalm K, Christopoulos C. Self-regulation and toxic stress report 3: A comprehensive review of self-regulation interventions. Washington, DC: Office of Planning, Research and Evaluation, Administration for Children and Families, U.S. Department of Health and Human Services, 2016.
38. Dozier M, Peloso E, Lewis E, et al. Effects of an attachment-based intervention on the cortisol production of infants and toddlers in foster care. *Dev Psychopathol* 2008;20(3):845-59. doi: 10.1017/S0954579408000400
39. Bernard K, Dozier M, Bick J, et al. Intervening to enhance cortisol regulation among children at risk for neglect: Results of a randomized clinical trial. *Dev Psychopathol* 2015;27(3):829-41. doi: 10.1017/S095457941400073X
40. Sanders MR. Development, Evaluation, and Multinational Dissemination of the Triple P-Positive Parenting Program. *Annu Rev Clin Psychol* 2012;8(1):345-79. doi: 10.1146/annurev-clinpsy-032511-143104
41. Leijten P, Gardner F, Landau S, et al. Research review: Harnessing the power of individual participant data in a meta-analysis of the benefits and harms of the Incredible Years parenting program. *J Child Psychol Psychiatry* 2018;59(2):99-109. doi: 10.1111/jcpp.12781
42. Webster-Stratton C, Jamila Reid M, Stoolmiller M. Preventing conduct problems and improving school readiness: evaluation of the Incredible Years Teacher and Child Training Programs in high-risk schools. *J Child Psychol Psychiatry* 2008;49(5):471-88. doi: 10.1111/j.1469-7610.2007.01861.x
43. Weeland J, Chhangur RR, van der Giessen D, et al. Intervention Effectiveness of The Incredible Years: New Insights Into Sociodemographic and Intervention-Based Moderators. *Behav Ther* 2016;48(1):1-18. doi: 10.1016/j.beth.2016.08.002

44. Chang H, Shaw DS, Dishion TJ, et al. Direct and indirect effects of the Family Check-Up on self-regulation from toddlerhood to early school-age. *J Abnorm Child Psychol* 2014;42(7):1117-28. doi: 10.1007/s10802-014-9859-8
45. Chang H, Shaw DS, Dishion TJ, et al. Proactive parenting and children's effortful control: Mediating role of language and indirect intervention effects. *Social Development* 2015;24(1):206-23. doi: 10.1111/sode.12069
46. Rothenberg WA, Weinstein A, Dandes EA, et al. Improving Child Emotion Regulation: Effects of Parent–Child Interaction-therapy and Emotion Socialization Strategies. *Journal of child and family studies* 2019;28(3):720-31. doi: 10.1007/s10826-018-1302-2
47. Lieneman CC, Girard EI, Quetsch LB, et al. Emotion Regulation and Attrition in Parent–Child Interaction Therapy. *Journal of child and family studies* 2019;29(4):978-96. doi: 10.1007/s10826-019-01674-4
48. Chronis-Tuscano A, Lewis-Morrarty E, Woods KE, et al. Parent–Child Interaction Therapy With Emotion Coaching for Preschoolers With Attention-Deficit/Hyperactivity Disorder. *Cognitive and behavioral practice* 2016;23(1):62-78. doi: 10.1016/j.cbpra.2014.11.001
49. Fernandez MA, Eyberg SM. Predicting Treatment and Follow-up Attrition in Parent–Child Interaction Therapy. *J Abnorm Child Psychol* 2008;37(3):431-41. doi: 10.1007/s10802-008-9281-1
50. Bierman KL, Nix RL, Greenberg MT, et al. Executive functions and school readiness intervention: impact, moderation, and mediation in the Head Start REDI program. *Dev Psychopathol* 2008;20(3):821-43. doi: 10.1017/s0954579408000394 [published Online First: 2008/07/09]
51. Schmitt SA, McClelland MM, Tominey SL, et al. Strengthening school readiness for Head Start children: Evaluation of a self-regulation intervention. *Early Childhood Research Quarterly* 2015;30:20-31. doi: 10.1016/j.ecresq.2014.08.001
52. Kaminski RA, Stormshak EA, Good RH, et al. Prevention of Substance Abuse With Rural Head Start Children and Families: Results of Project STAR. *Psychol Addict Behav* 2002;16(4S):S11-S26. doi: 10.1037/0893-164X.16.4S.S11

53. Raver CC, Jones SM, Li-Grining C, et al. CSRP's Impact on Low-Income Preschoolers' Preacademic Skills: Self-Regulation as a Mediating Mechanism. *Child Dev* 2011;82(1):362-78. doi: 10.1111/j.1467-8624.2010.01561.x
54. Pears KC, Healey CV, Fisher PA, et al. Immediate Effects of a Program to Promote School Readiness in Low-Income Children: Results of a Pilot Study. *Educ Treat Children* 2014;37(3):431-60. doi: 10.1353/etc.2014.0021
55. Diamond A, Barnett WS, Thomas J, et al. Preschool Program Improves Cognitive Control. *Science* 2007;318(5855):1387-88. doi: 10.1126/science.1151148
56. Barnett WS, Jung K, Yarosz DJ, et al. Educational effects of the Tools of the Mind curriculum: A randomized trial. *Early childhood research quarterly* 2008;23(3):299-313. doi: 10.1016/j.ecresq.2008.03.001
57. Solomon T, Plamondon A, O'Hara A, et al. A Cluster Randomized-Controlled Trial of the Impact of the Tools of the Mind Curriculum on Self-Regulation in Canadian Preschoolers. *Front Psychol* 2018;8:2366. doi: 10.3389/fpsyg.2017.02366
58. Diamond A, Lee C, Senften P, et al. Randomized control trial of Tools of the Mind: Marked benefits to kindergarten children and their teachers. *PLoS One* 2019;14(9):e0222447. doi: 10.1371/journal.pone.0222447
59. Sanders MR, Mazzucchelli TG. The Promotion of Self-Regulation Through Parenting Interventions. *Clin Child Fam Psychol Rev* 2013;16(1):1-17. doi: 10.1007/s10567-013-0129-z
60. Tully LA, Hunt C. Brief parenting interventions for children at risk of externalizing behavior problems: A systematic review. *Journal of Child and Family Studies* 2016;25(3):705-19. doi: 10.1007/s10826-015-0284-6
61. Webster-Stratton C, Reid MJ, Hammond M. Preventing Conduct Problems, Promoting Social Competence: A Parent and Teacher Training Partnership in Head Start. *Journal of Clinical Child & Adolescent Psychology* 2001;30(3):283-302. doi: 10.1207/S15374424JCCP3003\_2

62. Dodge KA. Toward Population Impact From Early Childhood Psychological Interventions. 2018;73(9):1117-29. doi: 10.1037/amp0000393
63. Shonkoff JP. Rethinking the Definition of Evidence-Based Interventions to Promote Early Childhood Development. *Pediatrics* 2017;140(6) doi: 10.1542/peds.2017-3136
64. Rayce SB, Rasmussen IS, Klest SK, et al. Effects of parenting interventions for at-risk parents with infants: a systematic review and meta-analyses. *BMJ Open* 2017;7(12):e015707. doi: 10.1136/bmjopen-2016-015707
65. Wu Y-C, Hsieh W-S, Hsu C-H, et al. Intervention effects on emotion regulation in preterm infants with very low birth weight: A randomized controlled trial. *Res Dev Disabil* 2016;48:1-12. doi: 10.1016/j.ridd.2015.10.016
66. Harris M, Andrews K, Gonzalez A, et al. Technology-assisted parenting interventions for families experiencing social disadvantage: a meta-analysis. *Prevention Science* 2020;21:714-27. doi: <https://doi.org/10.1007/s11121-020-01128-0>
67. Feil EG, Baggett KM, Davis B, et al. Expanding the Reach of Preventive Interventions: Development of an Internet-Based Training for Parents of Infants. *Child Maltreat* 2008;13(4):334-46. doi: 10.1177/1077559508322446
68. Tarver J, Daley D, Lockwood J, et al. Are self-directed parenting interventions sufficient for externalising behaviour problems in childhood? A systematic review and meta-analysis. *Eur Child Adolesc Psychiatry* 2014;23(12):1123-37. doi: 10.1007/s00787-014-0556-5
69. Rayno SM, McGrath PJ. Predictors of parent training efficacy for child externalizing behavior problems - a meta-analytic review. *The Journal of Child Psychology and Psychiatry* 2006;47(1):99-111. doi: <https://doi-org.dbgw.lis.curtin.edu.au/10.1111/j.1469-7610.2005.01544.x>
70. Smith JD, Cruden GH, Rojas LM, et al. Parenting interventions in pediatric primary care: A systematic review. *Pediatrics* 2020;146(1):e20193548.
71. Pawson R, Tilley N. Realistic evaluation. London: Sage 1997.

72. Greenhalgh T, Wong G, Westhorp G, et al. Protocol - realist and meta-narrative evidence synthesis: Evolving Standards (RAMESES). *BMC Med Res Methodol* 2011;11(1):115-15. doi: 10.1186/1471-2288-11-115
73. Rycroft-Malone J, McCormack B, Hutchinson AM, et al. Realist synthesis: illustrating the method for implementation research. *Implement Sci* 2012;7(1):33. doi: 10.1186/1748-5908-7-33
74. Pawson R, Greenhalgh T, Harvey G, et al. Realist review – a new method of systematic review designed for complex policy interventions. *J Health Serv Res Policy* 2005;10(1\_suppl):21-34. doi: 10.1258/1355819054308530
75. Wong G, Greenhalgh T, Westhorp G, et al. RAMESES publication standards: realist syntheses. *BMC Med* 2013;11(1):21-21. doi: 10.1186/1741-7015-11-21
76. Kaminski JW, Valle LA, Filene JH, et al. A meta-analytic review of components associated with parent training program effectiveness. *Journal of Abnormal Child Psychology* 2008;36:567-89.
77. Sandler IN, Schoenfelder EN, Wolchik SA, et al. Long-Term Impact of Prevention Programs to Promote Effective Parenting: Lasting Effects but Uncertain Processes. *Annu Rev Psychol* 2011;62(1):299-329. doi: 10.1146/annurev.psych.121208.131619
78. Coles E, Cheyne H, Daniel BD. Early years interventions to improve child health and wellbeing: what works, for whom and in what circumstances? Protocol for a realist review. *Systematic Reviews* 2015;4(1):79. doi: 10.1186/s13643-015-0068-5
79. Bramer WM, Rethlefsen ML, Kleijnen J, et al. Optimal database combinations for literature searches in systematic reviews: a prospective exploratory study. *Systematic Reviews* 2017;6(1):245. doi: 10.1186/s13643-017-0644-y
80. Pawson R. Evidence-based policy. A realist perspective. London: Sage 2006.
81. Sterne JAC, Savović J, Page MJ, et al. RoB 2: a revised tool for assessing risk of bias in randomised trials. *BMJ* 2019;366:l4898. doi: 10.1136/bmj.l4898
82. Sterne JA, Hernán MA, Reeves BC, et al. ROBINS-I: a tool for assessing risk of bias in non-randomised studies of interventions. *BMJ* 2016;355:i4919. doi: 10.1136/bmj.i4919

83. Tong A, Sainsbury P, Craig J. Consolidated criteria for reporting qualitative research (COREQ): a 32-item checklist for interviews and focus groups. *International Journal for Quality in Health Care* 2007;19(6):349-57. doi: 10.1093/intqhc/mzm042
